# Supplementary material
Source: publisher figshare collection journal article supplement (https://acs.figshare.com/ndownloader/files/16942598)
Supplement: Supplementary file 1 [file 16942598]

# Designing Flexible Quantum Spin Hall Insulators through 2D Ordered Hybrid Transition Metal Carbides

*Zhongheng Fu,<sup>1,2</sup> Zhaorui Liu,<sup>1,2</sup> Dominik Legut,<sup>3</sup> Timothy C. Germann,<sup>4</sup> Chen Si,<sup>1,2</sup> Shiyu Du,<sup>5</sup>  
Joseph S. Francisco,<sup>6</sup> and Ruifeng Zhang<sup>1,2,\*</sup>*

*<sup>1</sup>School of Materials Science and Engineering, Beihang University, Beijing 100191, P. R. China*

*<sup>2</sup>Center for Integrated Computational Materials Engineering (International Research Institute  
for Multidisciplinary Science) and Key Laboratory of High-Temperature Structural Materials &  
Coatings Technology (Ministry of Industry and Information Technology), Beihang University,  
Beijing 100191, P. R. China*

*<sup>3</sup>IT4Innovations, VSB-Technical University of Ostrava, CZ-70800 Ostrava, Czech Republic*

*<sup>4</sup>Theoretical Division, Los Alamos National Laboratory, Los Alamos, New Mexico, 87545,  
United States*

*<sup>5</sup>Engineering Laboratory of Specialty Fibers and Nuclear Energy Materials, Ningbo Institute of  
Materials Technology and Engineering, Chinese Academy of Sciences, Ningbo, Zhejiang,  
315201, P. R. China*

*<sup>6</sup>Department of Earth and Environmental Science and Department of Chemistry, University of Pennsylvania, Philadelphia, PA, 19104, United States*

**Table S1.** Total energies in eV/atom of  $M''_2M'C_2O_2$  in different configurations. The total energies of the most stable configurations are set as zero energy.

|                | configuration I | configuration II | configuration III |
|----------------|-----------------|------------------|-------------------|
| $Mo_2TiC_2O_2$ | 0.17            | 0.00             | 0.09              |
| $W_2TiC_2O_2$  | 0.18            | 0.00             | 0.10              |
| $Mo_2ZrC_2O_2$ | 0.14            | 0.00             | 0.07              |
| $W_2ZrC_2O_2$  | 0.14            | 0.00             | 0.08              |
| $Mo_2HfC_2O_2$ | 0.15            | 0.00             | 0.08              |
| $W_2HfC_2O_2$  | 0.16            | 0.00             | 0.09              |

**Table S2.** Band gaps in eV of selected  $M''_2M'C_2O_2$  for the test of  $U$  values of GGA +  $U$ . Note that the SOC interaction is considered in the related calculations.

| $U$ (eV) | $Mo_2TiC_2O_2$ | $W_2HfC_2O_2$ |
|----------|----------------|---------------|
| 0        | 0.04           | 0.28          |
| 1        | 0.05           | 0.29          |
| 2        | 0.06           | 0.31          |
| 3        | 0.08           | 0.34          |
| 4        | 0.11           | 0.38          |
| 5        | 0.15           | 0.45          |

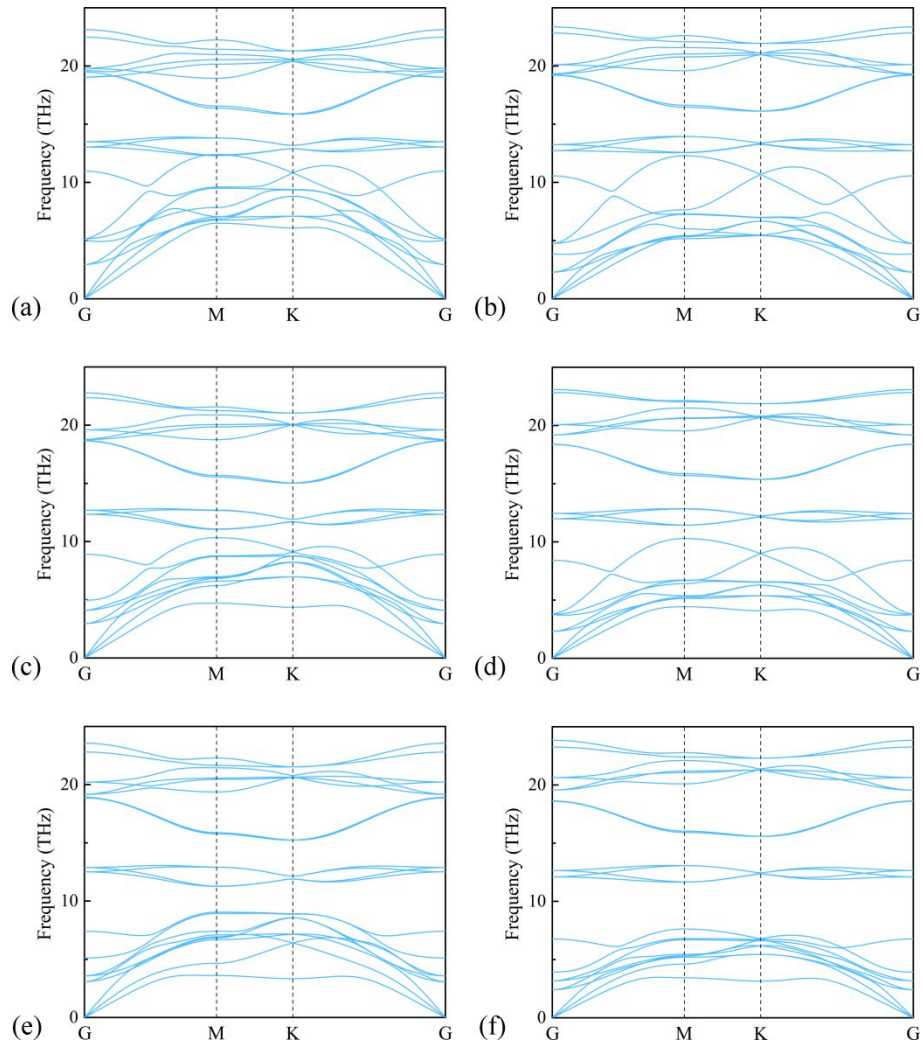

**Figure S1.** Phonon dispersions of (a)  $\text{Mo}_2\text{TiC}_2\text{O}_2$ , (b)  $\text{W}_2\text{TiC}_2\text{O}_2$ , (c)  $\text{Mo}_2\text{ZrC}_2\text{O}_2$ , (d)  $\text{W}_2\text{ZrC}_2\text{O}_2$ , (e)  $\text{Mo}_2\text{HfC}_2\text{O}_2$ , and (f)  $\text{W}_2\text{HfC}_2\text{O}_2$ .

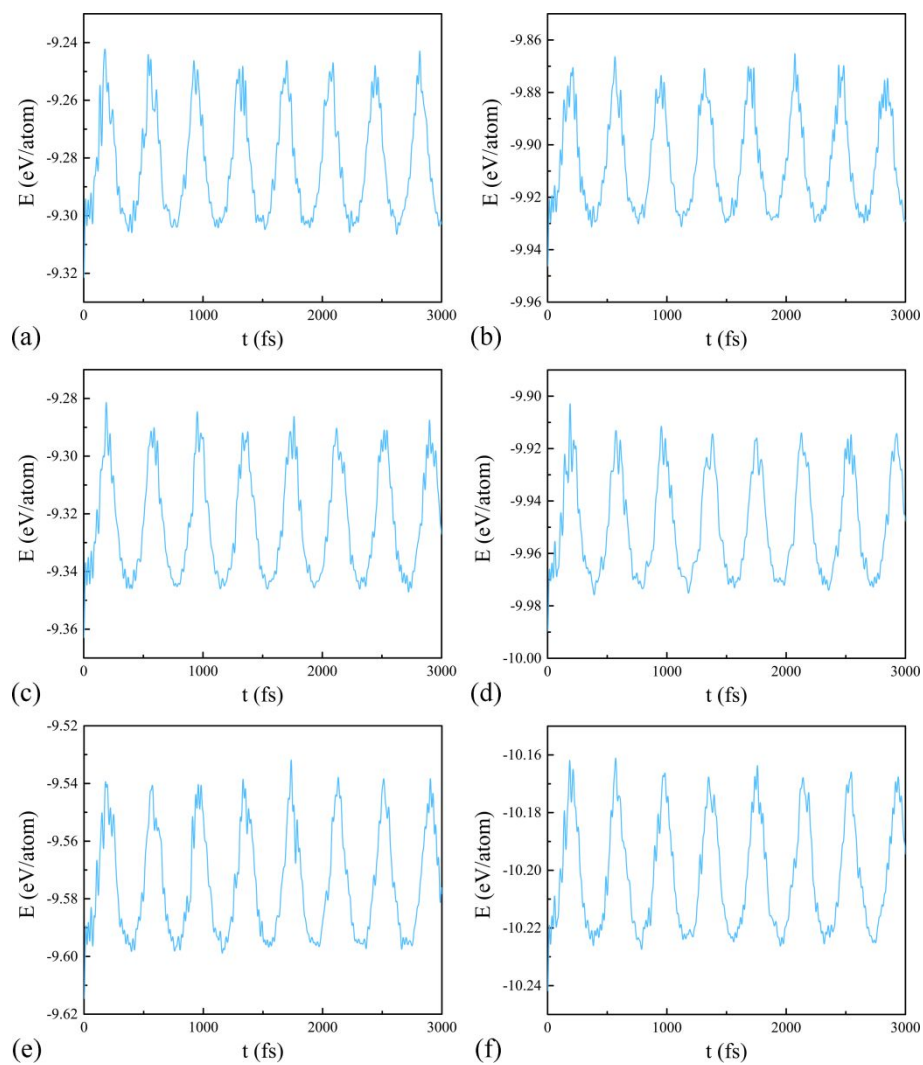

**Figure S2.** Variation of total energy during AIMD simulation at 300 K for (a)  $\text{Mo}_2\text{TiC}_2\text{O}_2$ , (b)  $\text{W}_2\text{TiC}_2\text{O}_2$ , (c)  $\text{Mo}_2\text{ZrC}_2\text{O}_2$ , (d)  $\text{W}_2\text{ZrC}_2\text{O}_2$ , (e)  $\text{Mo}_2\text{HfC}_2\text{O}_2$ , and (f)  $\text{W}_2\text{HfC}_2\text{O}_2$ .

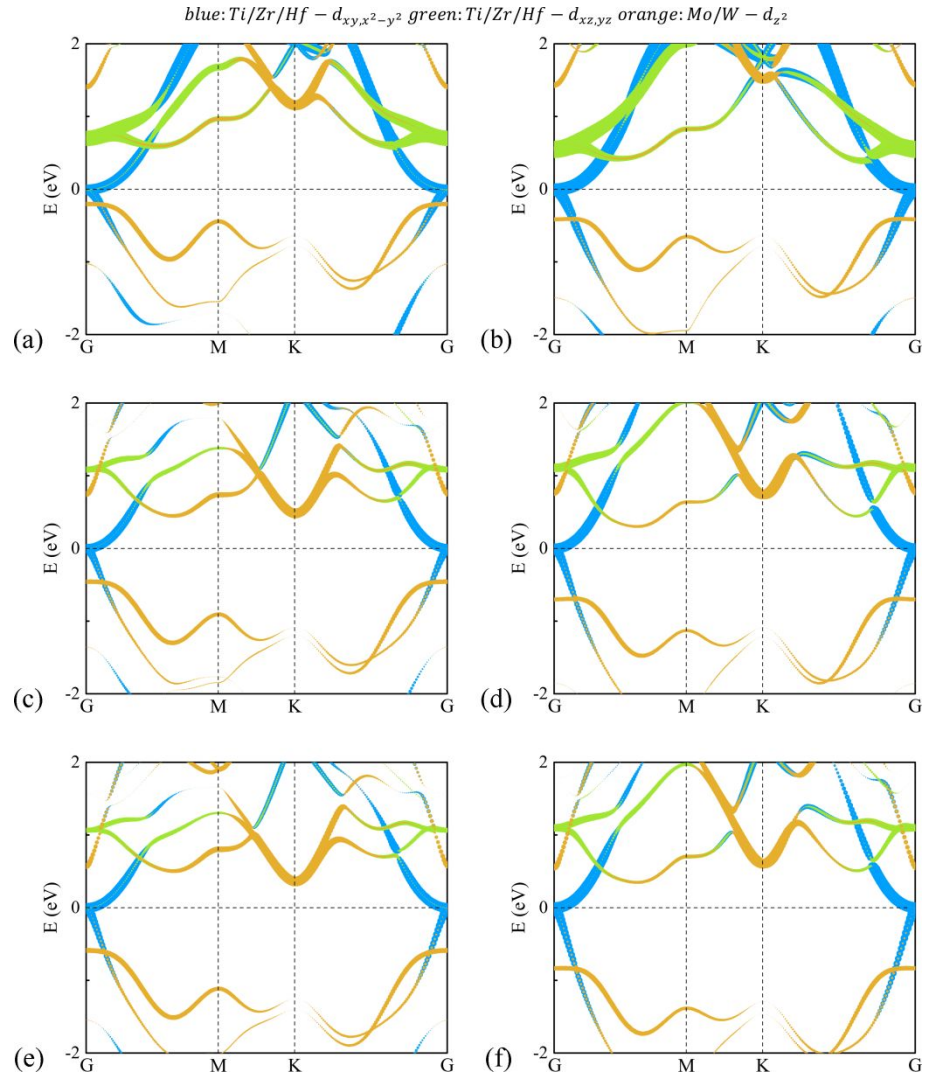

**Figure S3.** Projected band structures of (a)  $\text{Mo}_2\text{TiC}_2\text{O}_2$ , (b)  $\text{W}_2\text{TiC}_2\text{O}_2$ , (c)  $\text{Mo}_2\text{ZrC}_2\text{O}_2$ , (d)  $\text{W}_2\text{ZrC}_2\text{O}_2$ , (e)  $\text{Mo}_2\text{HfC}_2\text{O}_2$ , and (f)  $\text{W}_2\text{HfC}_2\text{O}_2$  in GGA. The Fermi level is set to zero energy.

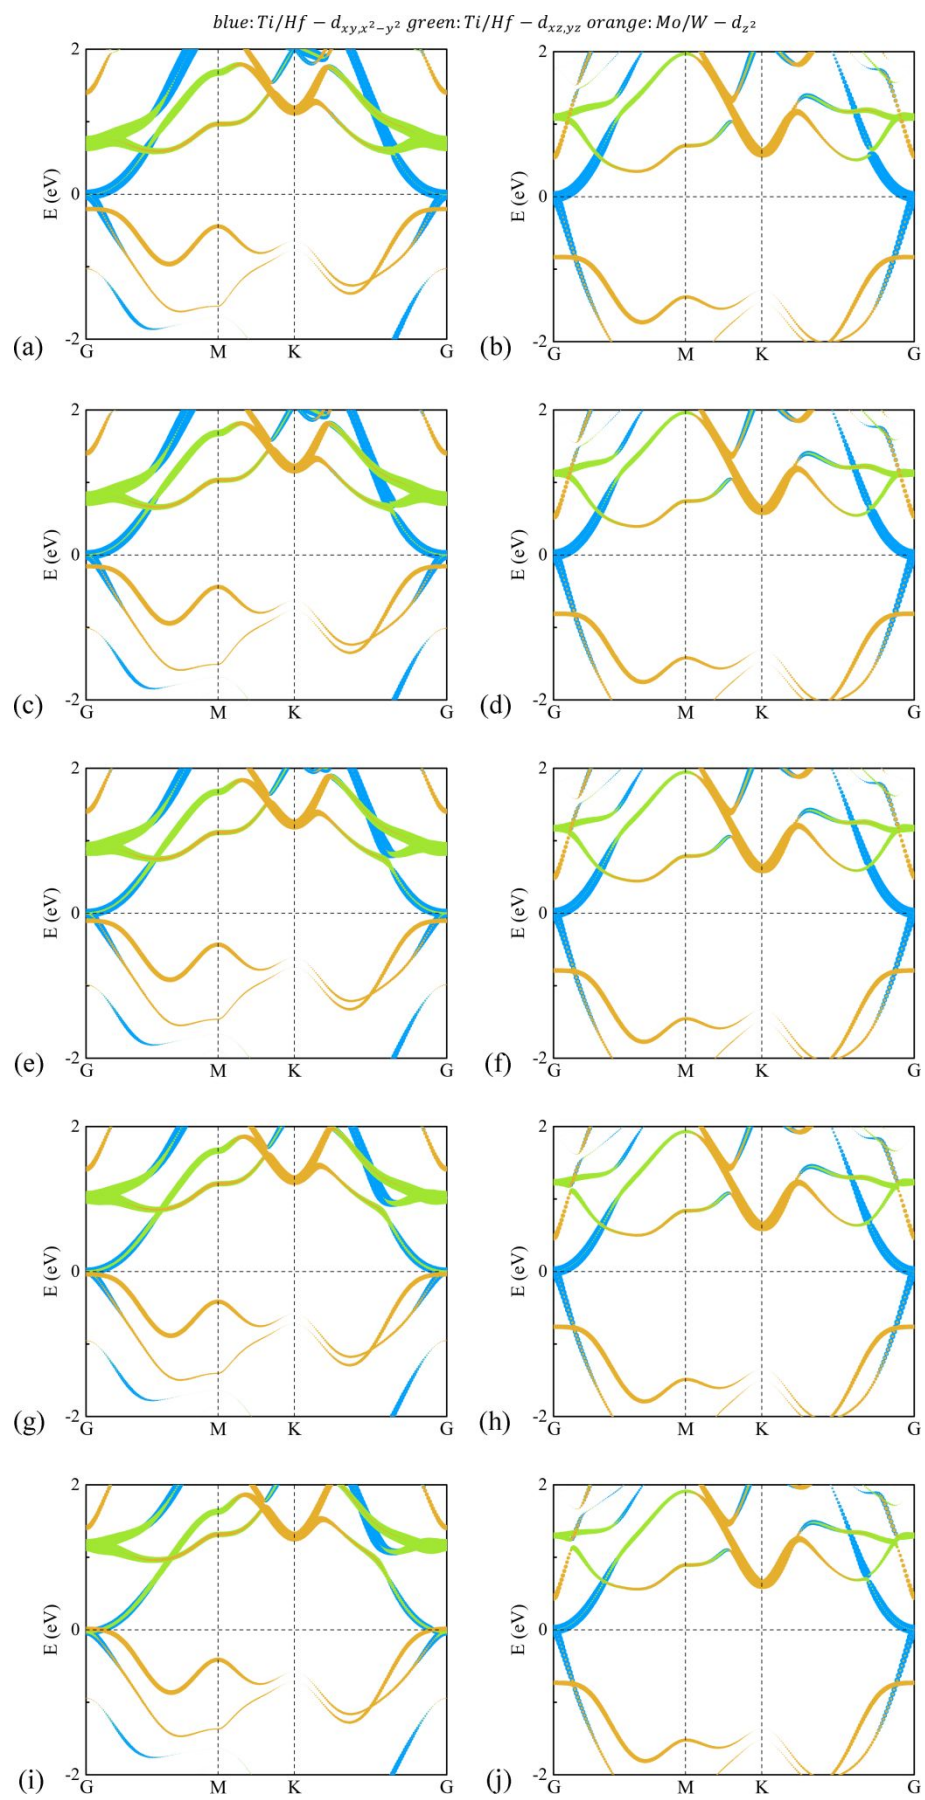



**Figure S4.** Projected band structures of  $\text{Mo}_2\text{TiC}_2\text{O}_2$  in GGA +  $U$ , where (a)  $U = 0$  eV, (c)  $U = 1$  eV, (e)  $U = 2$  eV, (g)  $U = 3$  eV, and (i)  $U = 4$  eV. Projected band structures of  $\text{W}_2\text{HfC}_2\text{O}_2$  in GGA +  $U$ , where (b)  $U = 0$  eV, (d)  $U = 1$  eV, (f)  $U = 2$  eV, (h)  $U = 3$  eV, and (j)  $U = 4$  eV. The Fermi level is set to zero energy.

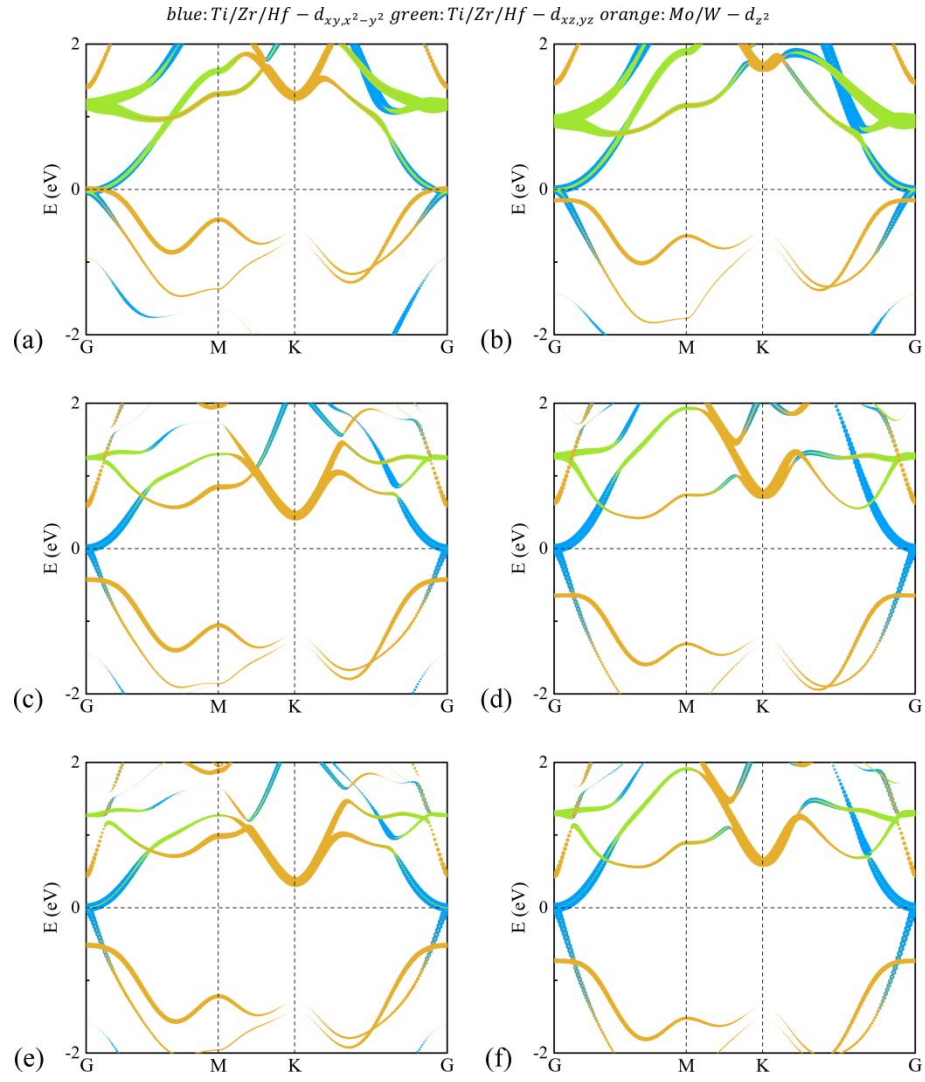

**Figure S5.** Projected band structures of (a)  $\text{Mo}_2\text{TiC}_2\text{O}_2$ , (b)  $\text{W}_2\text{TiC}_2\text{O}_2$ , (c)  $\text{Mo}_2\text{ZrC}_2\text{O}_2$ , (d)  $\text{W}_2\text{ZrC}_2\text{O}_2$ , (e)  $\text{Mo}_2\text{HfC}_2\text{O}_2$ , and (f)  $\text{W}_2\text{HfC}_2\text{O}_2$  in GGA +  $U$  ( $U = 4$  eV). The Fermi level is set to zero energy.

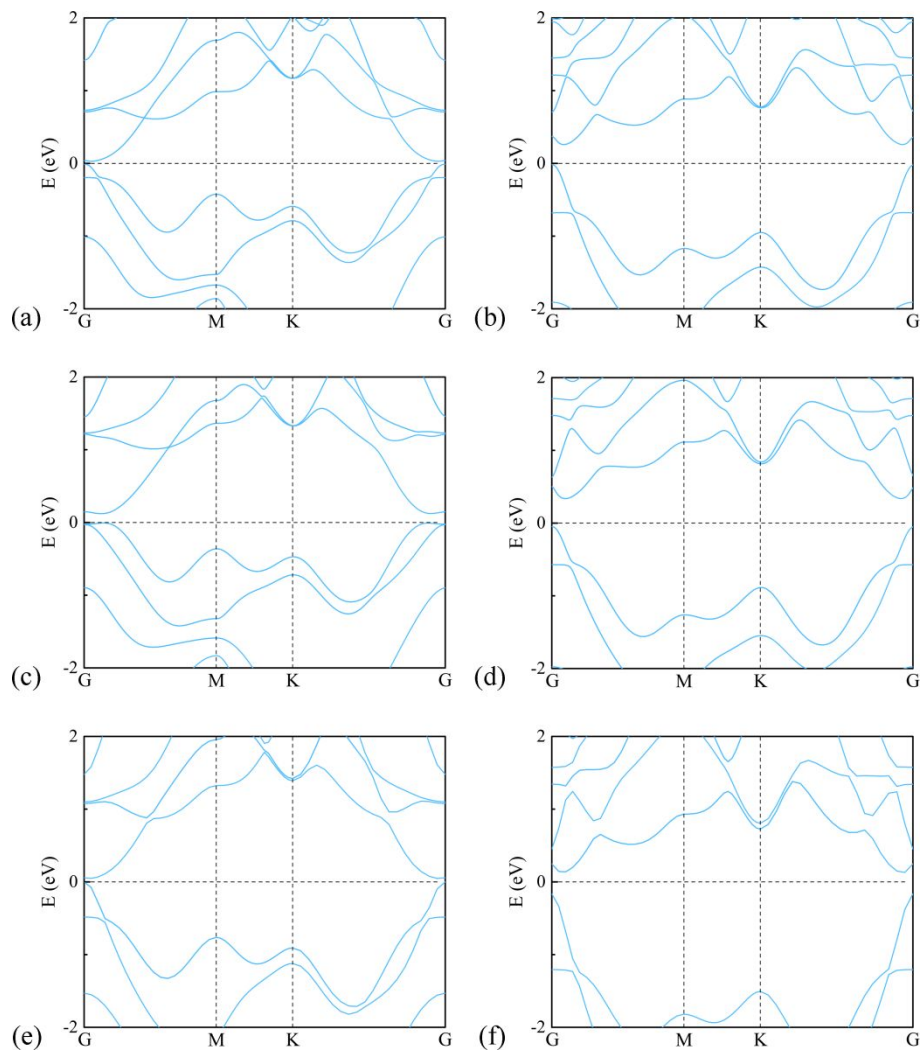

**Figure S6.** Electronic band structures of  $\text{Mo}_2\text{TiC}_2\text{O}_2$  in (a) GGA, (c) GGA+  $U$  ( $U = 4$  eV), and (e) HSE. Electronic band structures of  $\text{W}_2\text{HfC}_2\text{O}_2$  in (b) GGA, (d) GGA+  $U$  ( $U = 4$  eV), and (f) HSE. The SOC interaction is considered in the calculation of the band structures. The Fermi level is set to zero energy.

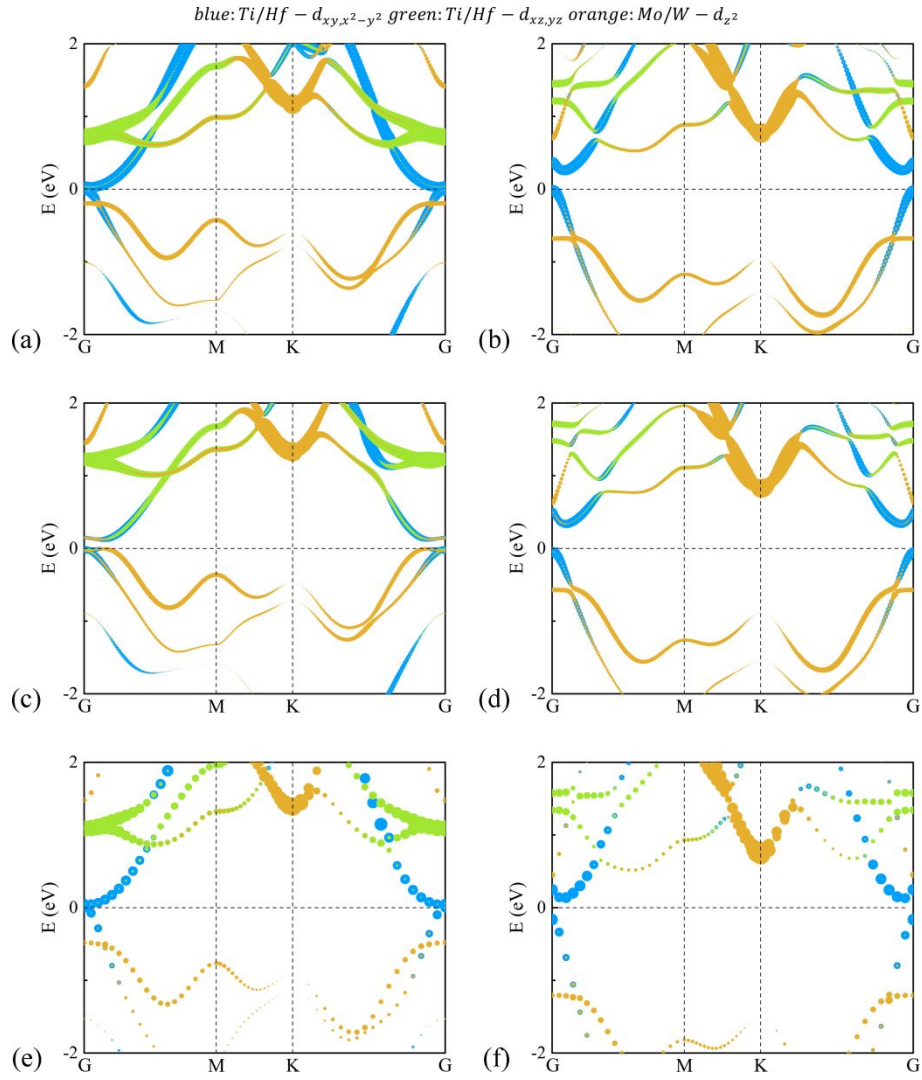

**Figure S7.** Projected band structures of  $\text{Mo}_2\text{TiC}_2\text{O}_2$  in (a) GGA, (c) GGA+  $U$  ( $U = 4$  eV), and (e) HSE. Projected band structures of  $\text{W}_2\text{HfC}_2\text{O}_2$  in (b) GGA, (d) GGA+  $U$  ( $U = 4$  eV), and (f) HSE. The SOC interaction is considered in the calculation of the band structures. The Fermi level is set to zero energy.

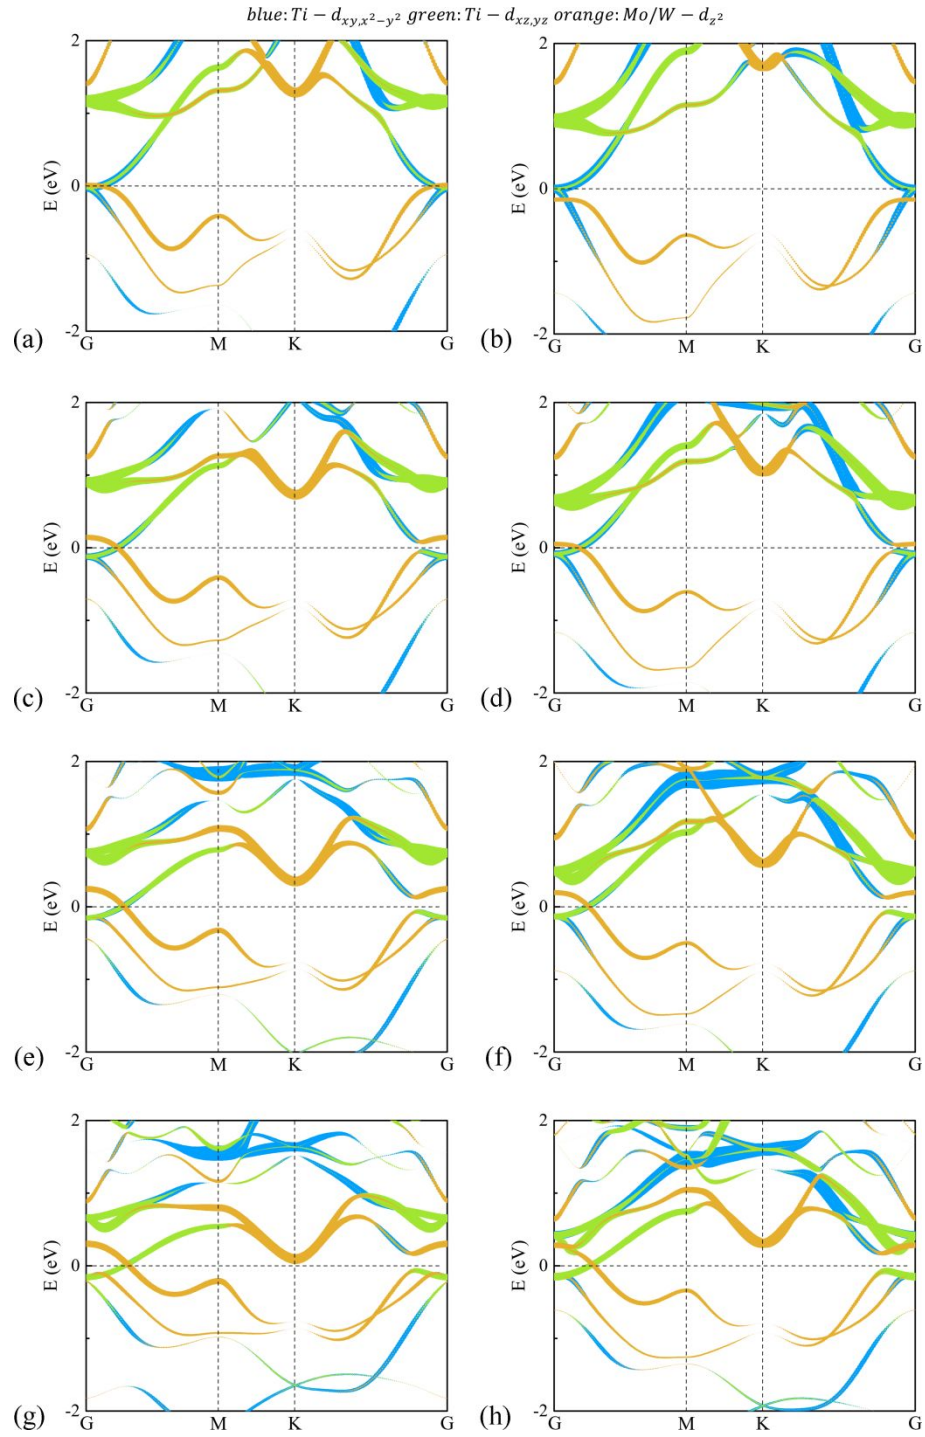

**Figure S8.** Projected band structures of  $\text{Mo}_2\text{TiC}_2\text{O}_2$  (a) in equilibrium, (c) at strain  $\varepsilon = 5\%$ , (e) at strain  $\varepsilon = 10\%$ , and (g) at strain  $\varepsilon = 15\%$ . Projected band structures of  $\text{W}_2\text{TiC}_2\text{O}_2$  (b) in equilibrium, (d) at strain  $\varepsilon = 5\%$ , (f) at strain  $\varepsilon = 10\%$ , and (h) at strain  $\varepsilon = 15\%$ . The Fermi level is set to zero energy.



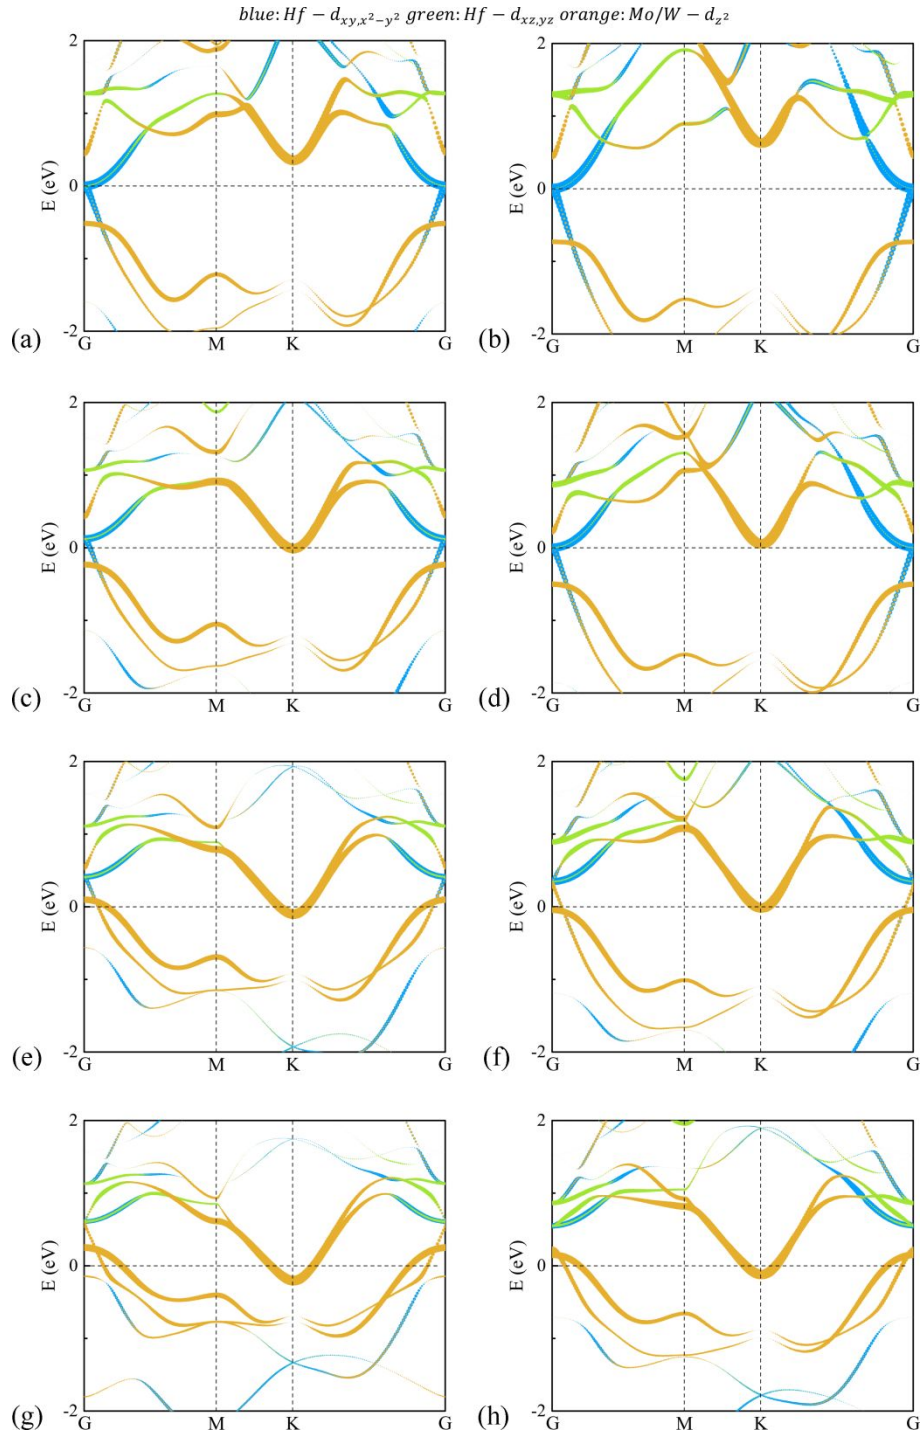

**Figure S9.** Projected band structures of  $Mo_2HfC_2O_2$  (a) in equilibrium, (c) at strain  $\varepsilon = 5\%$ , (e) at strain  $\varepsilon = 10\%$ , and (g) at strain  $\varepsilon = 15\%$ . Projected band structures of  $W_2HfC_2O_2$  (b) in equilibrium, (d) at strain  $\varepsilon = 5\%$ , (f) at strain  $\varepsilon = 10\%$ , and (h) at strain  $\varepsilon = 15\%$ . The Fermi level is set to zero energy.

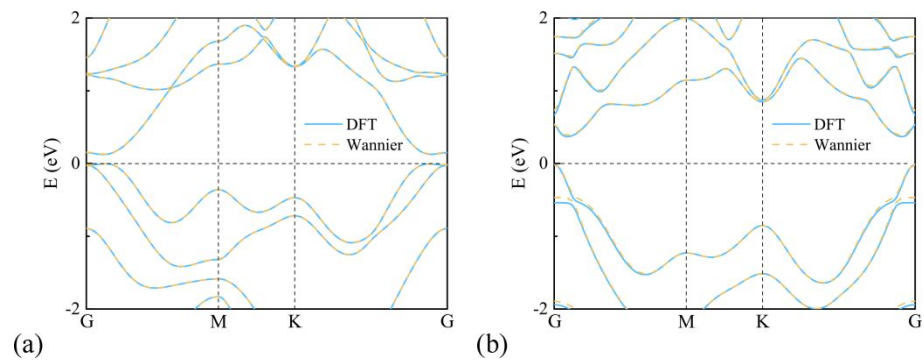

**Figure S10.** The fitted band structures to DFT and MLWFs for (a)  $\text{Mo}_2\text{TiC}_2\text{O}_2$  and (b)  $\text{W}_2\text{HfC}_2\text{O}_2$ .

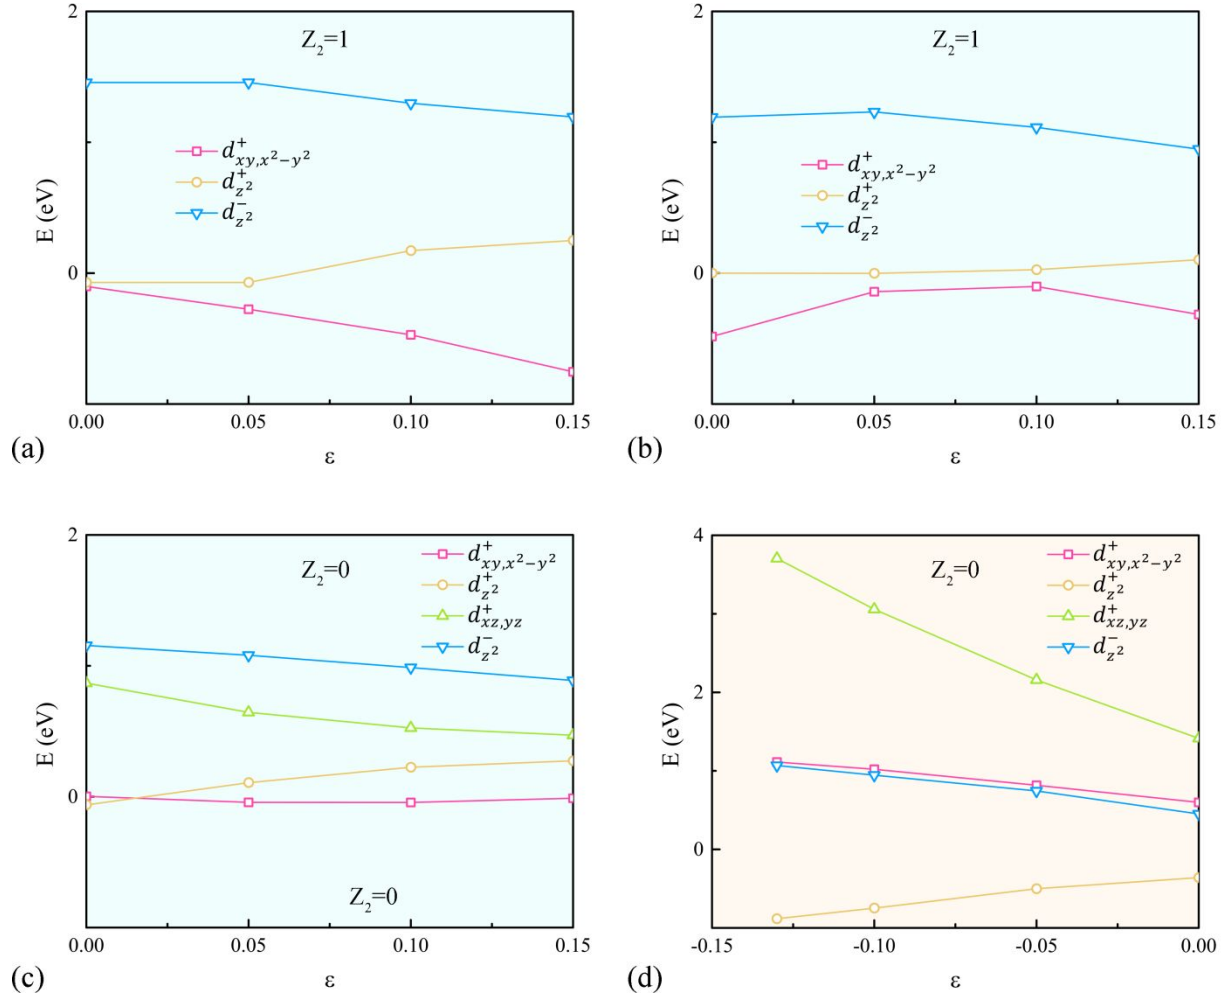

**Figure S11.** Energy levels of  $|M'' - d_{z^2}^\pm\rangle$ ,  $|M'' - d_{xy,x^2-y^2}^+\rangle$ , and  $|M'' - d_{z^2}^\pm\rangle$  states at  $\Gamma$  point vs strain  $\varepsilon$  curves of (a)  $\text{Mo}_2\text{CO}_2$  and (b)  $\text{W}_2\text{CO}_2$ . Energy levels of  $|M'' - d_{z^2}^\pm\rangle$ ,  $|M' - d_{xy,x^2-y^2}^+\rangle$ ,  $|M' - d_{xz,yz}^+\rangle$  and  $|M'' - d_{z^2}^\pm\rangle$  states at  $\Gamma$  point vs strain  $\varepsilon$  curves of (c)  $\text{Mo}_2\text{Ti}_2\text{C}_3\text{O}_2$  and (d)  $\text{W}_2\text{Hf}_2\text{C}_3\text{O}_2$ . Note that a compression strain is adopted in  $\text{W}_2\text{Hf}_2\text{C}_3\text{O}_2$ , different from the tensile strain in the others.



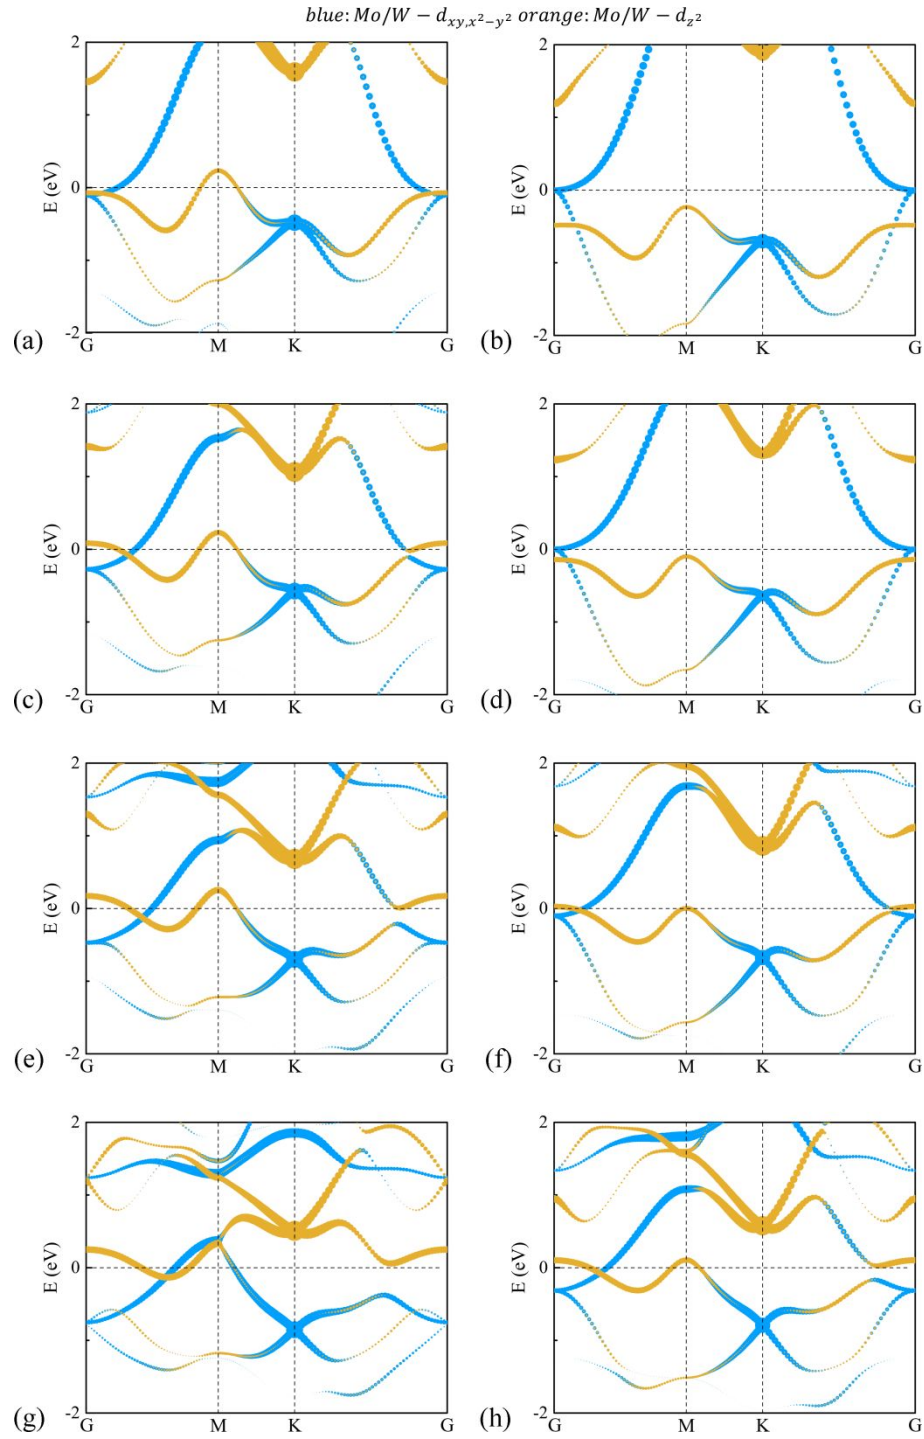

**Figure S12.** Projected band structures of  $Mo_2CO_2$  (a) in equilibrium, (c) at strain  $\varepsilon = 5\%$ , (e) at strain  $\varepsilon = 10\%$ , and (g) at strain  $\varepsilon = 15\%$ . Projected band structures of  $W_2CO_2$  (b) in equilibrium, (d) at strain  $\varepsilon = 5\%$ , (f) at strain  $\varepsilon = 10\%$ , and (h) at strain  $\varepsilon = 15\%$ . The Fermi level is set to zero energy.

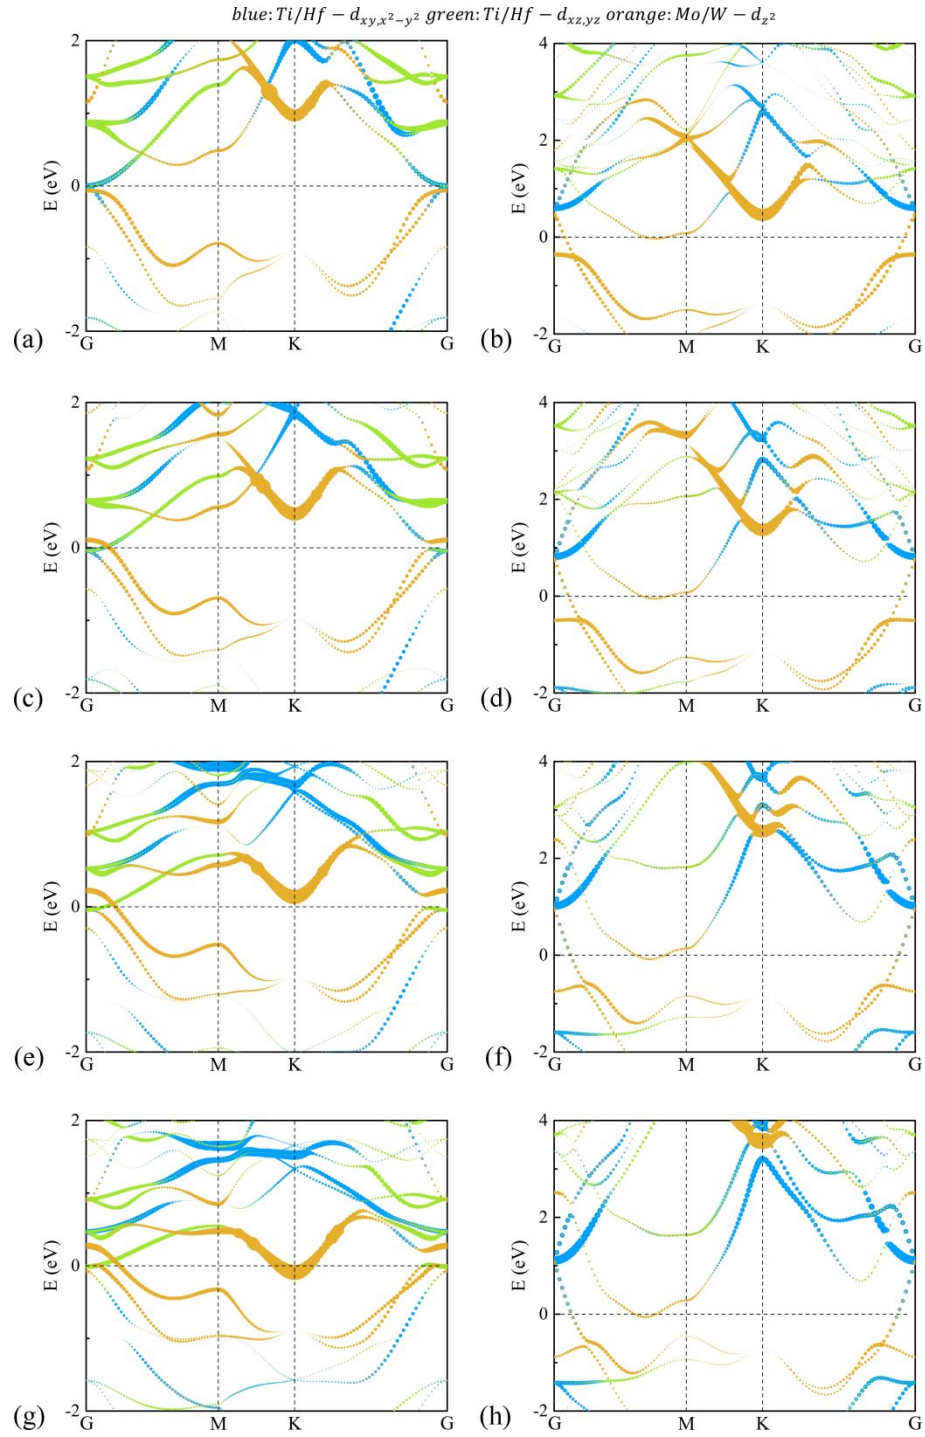

**Figure S13.** Projected band structures of  $\text{Mo}_2\text{Ti}_2\text{C}_3\text{O}_2$  (a) in equilibrium, (c) at strain  $\varepsilon = 5\%$ , (e) at strain  $\varepsilon = 10\%$ , and (g) at strain  $\varepsilon = 15\%$ . Projected band structures of  $\text{W}_2\text{Hf}_2\text{C}_3\text{O}_2$  (b) in equilibrium, (d) at strain  $\varepsilon = -5\%$ , (f) at strain  $\varepsilon = -10\%$ , and (h) at strain  $\varepsilon = -15\%$  (the symbol “-” represents the compression strain). The Fermi level is set to zero energy.

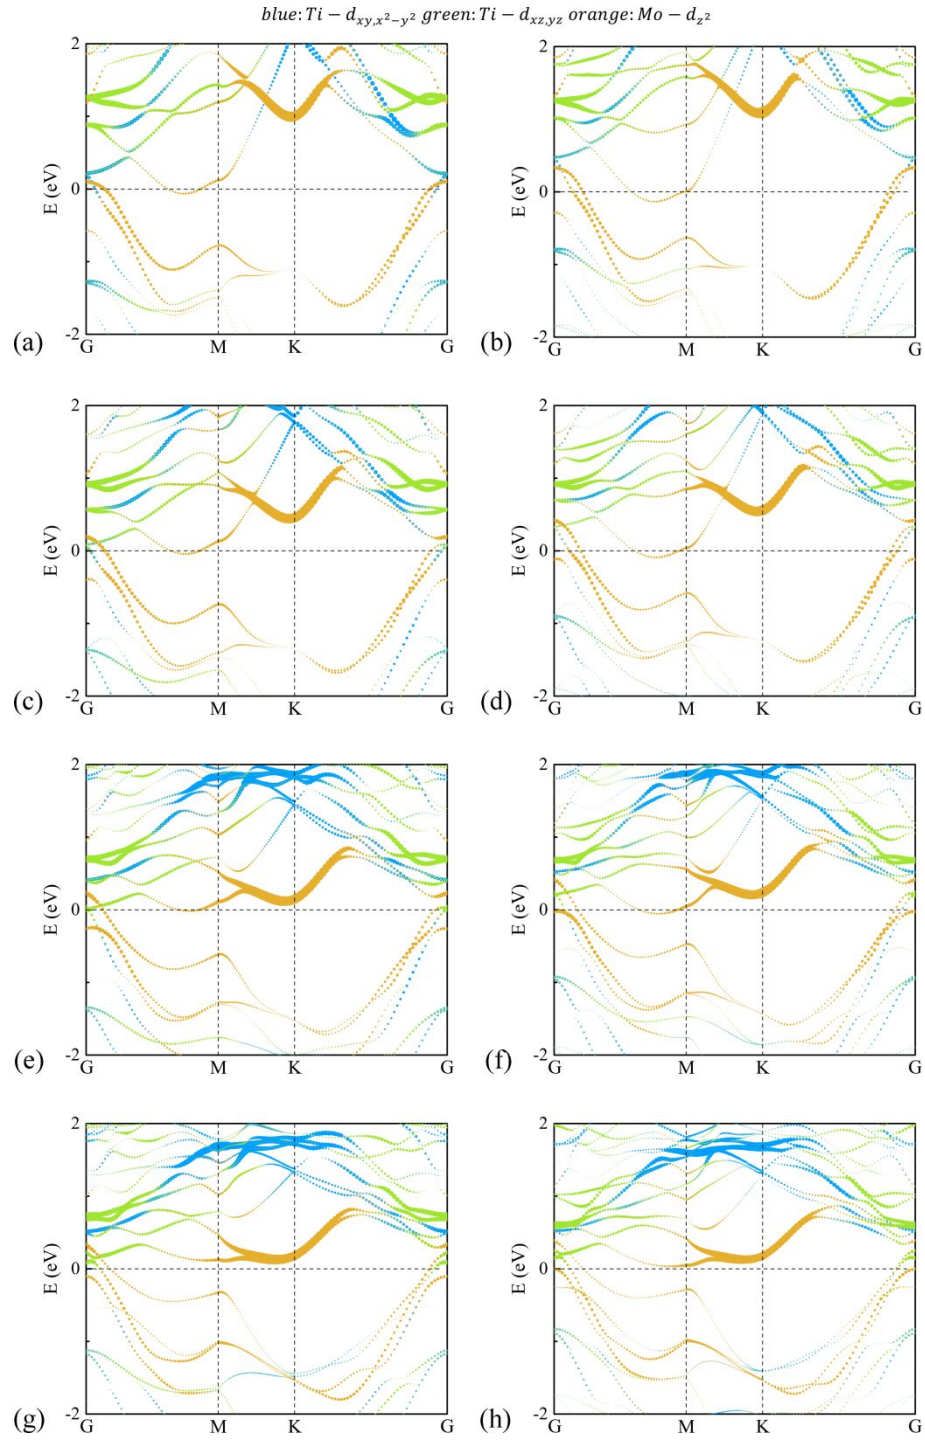

**Figure S14.** Projected band structures of  $Mo_2Ti_3C_4O_2$  (a) in equilibrium, (c) at strain  $\varepsilon = 5\%$ , (e) at strain  $\varepsilon = 10\%$ , and (g) at strain  $\varepsilon = 15\%$ . Projected band structures of  $Mo_2Ti_4C_5O_2$  (b) in equilibrium, (d) at strain  $\varepsilon = 5\%$ , (f) at strain  $\varepsilon = 10\%$ , and (h) at strain  $\varepsilon = 15\%$ . The Fermi level is set to zero energy.



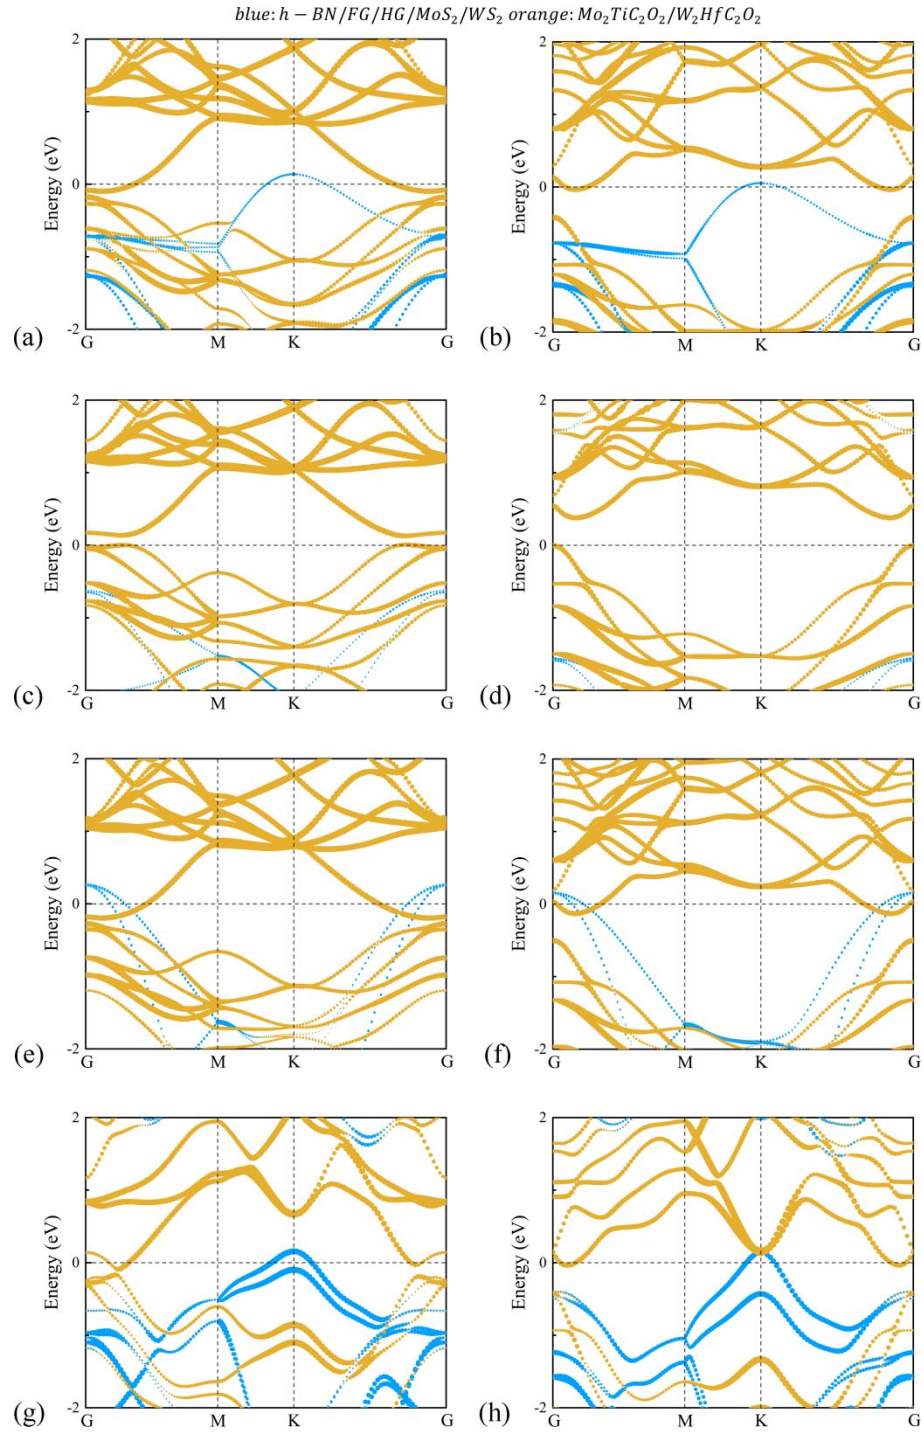

**Figure S15.** Atomic projected band structures of Mo<sub>2</sub>TiC<sub>2</sub>O<sub>2</sub> with large-gap coating layer (a) h-BN, (c) fluorographene, (e) graphane, (g) MoS<sub>2</sub>. Atomic projected band structures of W<sub>2</sub>HfC<sub>2</sub>O<sub>2</sub> with large-gap coating layer (b) h-BN, (d) fluorographene, (f) graphane, (h) WS<sub>2</sub>. The Fermi level is set to zero energy.

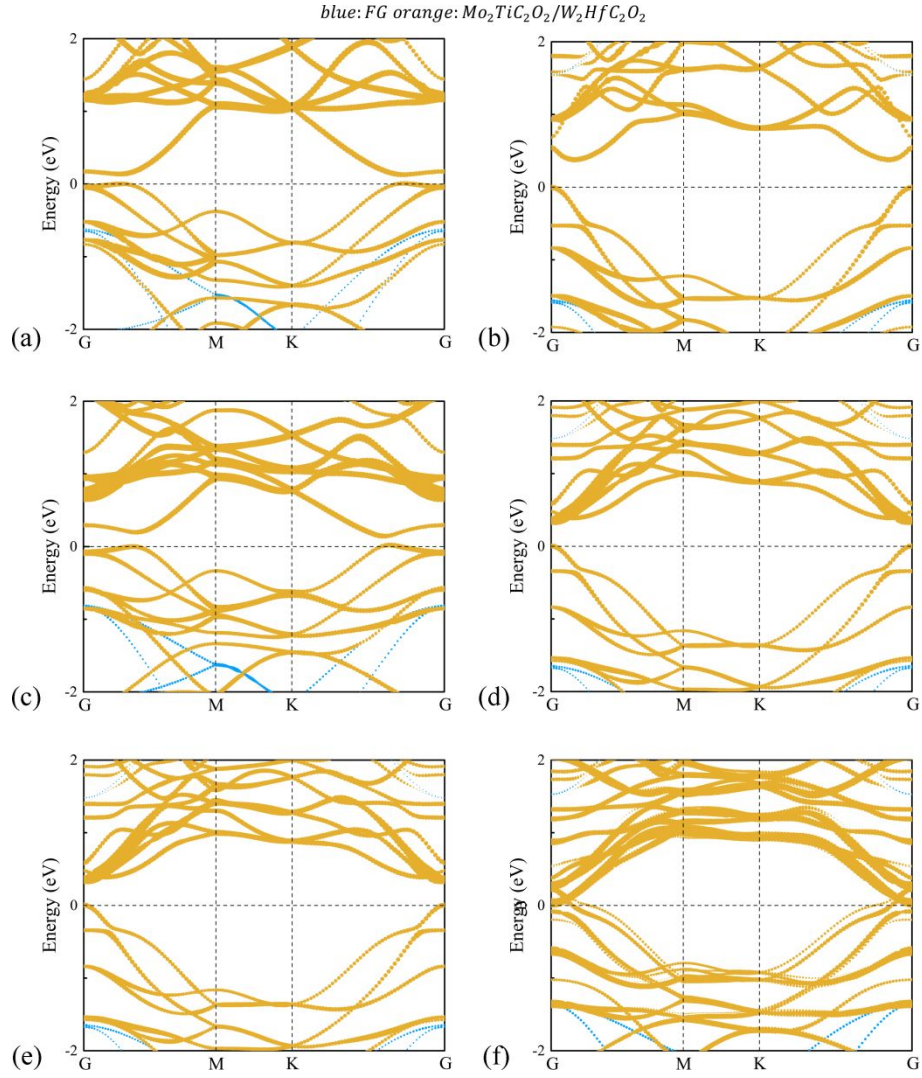

**Figure S16.** Atomic projected band structures of  $\text{Mo}_2\text{TiC}_2\text{O}_2$  with large-gap coating layer fluorographene (a) in equilibrium, (c) at strain  $\varepsilon = 5\%$ , and (e) at strain  $\varepsilon = 10\%$ . Atomic projected band structures of  $\text{W}_2\text{HfC}_2\text{O}_2$  with large-gap coating layer fluorographene (b) in equilibrium, (d) at strain  $\varepsilon = 5\%$ , and (f) at strain  $\varepsilon = 10\%$ . The Fermi level is set to zero energy.
